# Supplementary material for: Recent urbanization in China is correlated with a Westernized microbiome encoding increased virulence and antibiotic resistance genes
Source: Microbiome. 2017 Sep 15;5:121. doi: 10.1186/s40168-017-0338-7 (PMC5603068; doi:10.1186/s40168-017-0338-7)
Supplement: Supplementary file 9 — Significant associations between microbial taxa identified through 16S rRNA sequencing, metabolites, and metadata. Significant associations (Benjamini and Hochberg-adjusted linear model P value < 0.05) between (A) the microbiome as assessed by 16S rRNA sequencing and metabolite data, (B) the microbiome as assessed by 16S rRNA sequencing, and metadata or (C) the metadata and metabolite data. (A–B) p indicates the phylum, c the class, o the order, f the family, and g the genus. Each section is ordered by taxonomic level and then by P value. (XLSX 40 kb) [file 40168_2017_338_MOESM9_ESM.xlsx]

## Sheet: A 16S microbiome vs. metabolite
Taxonomic Level	Microbial Name	Metabolite Superpathway;Subpathway	Metabolite Name	linear model p-value	adjusted linear model p-value	Spearman correlation	R2	nonparametric test	nonparametric p-value for urban vs. rural	adjusted nonparametric p-value for urban vs. rural
Class	d__Bacteria;p__Firmicutes;c__Clostridia	Amino Acid;Methionine, Cysteine, SAM and Taurine Metabolism	S-methylcysteine	7.53664e-06	0.0352413	-0.305629	0.413953	Kendall	0.0414569	0.873232
Order	d__Bacteria;p__Actinobacteria;c__Actinobacteria;o__Coriobacteriales	Carbohydrate;Glycolysis, Gluconeogenesis, and Pyruvate Metabolism	lactate	4.35389e-06	0.0246494	-0.591182	0.43012	Kendall	0.000318009	0.452599
Order	d__Bacteria;p__Firmicutes;c__Clostridia;o__Clostridiales	Amino Acid;Methionine, Cysteine, SAM and Taurine Metabolism	S-methylcysteine	7.21624e-06	0.0246494	-0.300563	0.415248	Kendall	0.0438388	0.843266
Order	d__Bacteria;p__Proteobacteria;c__Gammaproteobacteria;o__Aeromonadales	Carbohydrate;Fructose, Mannose and Galactose Metabolism	mannitol	1.0543e-05	0.0246494	0.0931757	0.403854	Kendall	0.533175	0.961406
Order	d__Bacteria;p__Proteobacteria;c__Gammaproteobacteria;o__Aeromonadales	Amino Acid;Leucine, Isoleucine and Valine Metabolism	isobutyrylcarnitine	1.8538e-05	0.0325064	0.245342	0.386513	Kendall	0.132071	0.925997
Order	d__Bacteria;p__Bacteroidetes;c__Bacteroidia;o__Bacteroidales	Xenobiotics;Drug	salicylate	2.91917e-05	0.0409501	-0.369738	0.372228	Kendall	0.018724	0.765881
Order	d__Bacteria;p__Actinobacteria;c__Actinobacteria;o__Coriobacteriales	Carbohydrate;Glycolysis, Gluconeogenesis, and Pyruvate Metabolism	pyruvate	3.96075e-05	0.0437832	-0.467542	0.36246	Kendall	0.00235857	0.580352
Order	d__Bacteria;p__Fusobacteria;c__Fusobacteriia;o__Fusobacteriales	Lipid;Polyunsaturated Fatty Acid (n3 and n6)	dihomo-linolenate (20:3n3 or n6)	4.36958e-05	0.0437832	0.494159	0.359286	Kendall	0.00116348	0.494538
Family	d__Bacteria;p__Firmicutes;c__Bacilli;o__Lactobacillales;f__Leuconostocaceae	Lipid;Medium Chain Fatty Acid	10-undecenoate (11:1n1)	3.27485e-08	0.000415644	0.463333	0.556709	Kendall	0.00209951	0.604305
Family	d__Bacteria;p__Proteobacteria;c__Gammaproteobacteria;o__Aeromonadales;f__Succinivibrionaceae	Amino Acid;Leucine, Isoleucine and Valine Metabolism	isobutyrylcarnitine	7.53716e-07	0.00478308	0.409525	0.479037	Kendall	0.0110604	0.679491
Family	d__Bacteria;p__Actinobacteria;c__Actinobacteria;o__Actinomycetales;f__Corynebacteriaceae	Xenobiotics;Benzoate Metabolism	mandelate	1.2823e-06	0.005425	0.199905	0.46465	Kendall	0.216568	0.909157
Family	d__Bacteria;p__Proteobacteria;c__Gammaproteobacteria;o__Aeromonadales;f__Succinivibrionaceae	Carbohydrate;Fructose, Mannose and Galactose Metabolism	mannitol	1.91758e-06	0.00608447	0.184265	0.453507	Kendall	0.242175	0.911249
Family	d__Bacteria;p__Actinobacteria;c__Actinobacteria;o__Coriobacteriales;f__Coriobacteriaceae	Carbohydrate;Glycolysis, Gluconeogenesis, and Pyruvate Metabolism	lactate	4.74733e-06	0.0120506	-0.592683	0.427599	Kendall	0.000318009	0.604305
Family	d__Bacteria;p__Actinobacteria;c__Actinobacteria;o__Actinomycetales;f__Corynebacteriaceae	Xenobiotics;Food Component/Plant	piperine	2.19436e-05	0.0464181	0.293181	0.381242	Kendall	0.0638355	0.81182
Family	d__Bacteria;p__Firmicutes;c__Clostridia;o__Clostridiales;f__Clostridiaceae 1	Lipid;Sphingolipid Metabolism	stearoyl sphingomyelin (d18:1/18:0)	3.00245e-05	0.0480238	-0.594671	0.371333	Kendall	9.01339e-05	0.604305
Family	d__Bacteria;p__Proteobacteria;c__Betaproteobacteria;o__Burkholderiales;f__Oxalobacteraceae	Amino Acid;Phenylalanine and Tyrosine Metabolism	3-phenylpropionate (hydrocinnamate)	3.02703e-05	0.0480238	0.455501	0.371074	Kendall	0.0044899	0.605889
Genus	d__Bacteria;p__Proteobacteria;c__Gammaproteobacteria;o__Aeromonadales;f__Succinivibrionaceae;g__Succinivibrio	Amino Acid;Leucine, Isoleucine and Valine Metabolism	isobutyrylcarnitine	4.08877e-08	0.00118811	0.411855	0.5516	Kendall	0.00896645	0.63243
Genus	d__Bacteria;p__Proteobacteria;c__Gammaproteobacteria;o__Aeromonadales;f__Succinivibrionaceae;g__Succinivibrio	Carbohydrate;Fructose, Mannose and Galactose Metabolism	mannitol	8.8712e-08	0.0012889	0.188457	0.533321	Kendall	0.249274	0.906748
Genus	d__Bacteria;p__Firmicutes;c__Bacilli;o__Lactobacillales;f__Streptococcaceae;g__Lactococcus	Lipid;Medium Chain Fatty Acid	10-undecenoate (11:1n1)	3.55668e-07	0.003445	0.323086	0.498745	Kendall	0.0382639	0.74224
Genus	d__Bacteria;p__Firmicutes;c__Bacilli;o__Lactobacillales;f__Leuconostocaceae;g__Weissella	Lipid;Medium Chain Fatty Acid	10-undecenoate (11:1n1)	5.00719e-07	0.00363747	0.397972	0.489859	Kendall	0.00962746	0.642588
Genus	d__Bacteria;p__Actinobacteria;c__Actinobacteria;o__Actinomycetales;f__Corynebacteriaceae;g__Corynebacterium	Xenobiotics;Benzoate Metabolism	mandelate	7.71054e-07	0.00448106	0.190792	0.478429	Kendall	0.238441	0.901367
Genus	d__Bacteria;p__Firmicutes;c__Bacilli;o__Lactobacillales;f__Leuconostocaceae;g__Leuconostoc	Lipid;Medium Chain Fatty Acid	10-undecenoate (11:1n1)	3.43734e-06	0.016647	0.198859	0.436956	Kendall	0.217235	0.893224
Genus	d__Bacteria;p__Actinobacteria;c__Actinobacteria;o__Coriobacteriales;f__Coriobacteriaceae;g__Atopobium	Amino Acid;Phenylalanine and Tyrosine Metabolism	phenyllactate (PLA)	4.18881e-06	0.0173883	0.486576	0.431243	Kendall	0.00194025	0.442389
Genus	d__Bacteria;p__Firmicutes;c__Clostridia;o__Clostridiales;f__Clostridiales Incertae Sedis XI;g__Parvimonas	Lipid;Eicosanoid	12-HETE	6.5888e-06	0.0239322	0.473607	0.417952	Kendall	0.00248837	0.469527
Genus	d__Bacteria;p__Firmicutes;c__Clostridia;o__Clostridiales;f__Lachnospiraceae;g__Coprococcus	Lipid;Secondary Bile Acid Metabolism	glycoursodeoxycholate	1.19472e-05	0.0385734	-0.625328	0.400051	Kendall	3.53231e-05	0.15489
Genus	d__Bacteria;p__Firmicutes;c__Clostridia;o__Clostridiales;f__Lachnospiraceae;g__Roseburia	Amino Acid;Methionine, Cysteine, SAM and Taurine Metabolism	S-methylcysteine	1.53777e-05	0.0445015	-0.264165	0.392306	Kendall	0.0867674	0.809661
Genus	d__Bacteria;p__Actinobacteria;c__Actinobacteria;o__Actinomycetales;f__Corynebacteriaceae;g__Corynebacterium	Xenobiotics;Food Component/Plant	piperine	1.68462e-05	0.0445015	0.285923	0.389485	Kendall	0.0725168	0.793347
OTU	d__Bacteria;p__Firmicutes;c__Clostridia;o__Clostridiales;f__Lachnospiraceae;g__Coprococcus;OTU388	Lipid;Fatty Acid, Monohydroxy	13-HODE + 9-HODE	2.94837e-11	6.82436e-06	0.350313	0.691901	Kendall	0.0264237	0.671175
OTU	d__Bacteria;p__Firmicutes;c__Bacilli;o__Lactobacillales;f__Lactobacillaceae;g__Lactobacillus;OTU434	Amino Acid;Phenylalanine and Tyrosine Metabolism	phenyllactate (PLA)	1.35058e-09	0.000145662	0.339129	0.624149	Kendall	0.0271397	0.673277
OTU	d__Bacteria;p__Firmicutes;c__Bacilli;o__Lactobacillales;f__Lactobacillaceae;g__Lactobacillus;OTU434	Xenobiotics;Benzoate Metabolism	mandelate	2.57507e-09	0.000145662	-0.0115184	0.61136	Kendall	0.930272	1
OTU	d__Bacteria;p__Firmicutes;c__Clostridia;o__Clostridiales;f__Lachnospiraceae;g__Coprococcus;OTU204	Xenobiotics;Benzoate Metabolism	hippurate	2.59295e-09	0.000145662	0.571499	0.61122	Kendall	0.000294209	0.327415
OTU	d__Bacteria;p__Firmicutes;c__Clostridia;o__Clostridiales;f__Lachnospiraceae;g__Coprococcus;OTU614	Xenobiotics;Benzoate Metabolism	hippurate	3.14656e-09	0.000145662	0.568735	0.607302	Kendall	0.00026226	0.324272
OTU	d__Bacteria;p__Firmicutes;c__Bacilli;o__Lactobacillales;f__Lactobacillaceae;g__Lactobacillus;OTU434	Xenobiotics;Benzoate Metabolism	2-hydroxyhippurate (salicylurate)	9.08683e-09	0.000319813	0.365733	0.585134	Kendall	0.0197049	0.640078
OTU	d__Bacteria;p__Firmicutes;c__Bacilli;o__Lactobacillales;f__Lactobacillaceae;g__Lactobacillus;OTU434	Amino Acid;Leucine, Isoleucine and Valine Metabolism	isobutyrylcarnitine	9.67196e-09	0.000319813	0.286045	0.583792	Kendall	0.0808742	0.774791
OTU	d__Bacteria;p__Firmicutes;c__Negativicutes;o__Selenomonadales;f__Veillonellaceae;g__Megasphaera;OTU490	Xenobiotics;Drug	salicyluric glucuronide	1.67724e-08	0.000485271	0.141358	0.571773	Kendall	0.429118	0.935982
OTU	d__Bacteria;p__Firmicutes;c__Bacilli;o__Lactobacillales;f__Lactobacillaceae;g__Lactobacillus;OTU434	Amino Acid;Phenylalanine and Tyrosine Metabolism	phenylacetylglutamine	6.09227e-08	0.00156681	0.278408	0.542277	Kendall	0.0914248	0.786041
OTU	d__Bacteria;p__Firmicutes;c__Bacilli;o__Lactobacillales;f__Lactobacillaceae;g__Lactobacillus;OTU434	Xenobiotics;Food Component/Plant	piperine	3.10212e-07	0.0068677	0.15138	0.502256	Kendall	0.352717	0.918332
OTU	d__Bacteria;p__Firmicutes;c__Clostridia;o__Clostridiales;f__Ruminococcaceae;g__Butyricicoccus;OTU708	Lipid;Steroid	andro steroid monosulfate 2	3.26381e-07	0.0068677	0.287665	0.500954	Kendall	0.0669222	0.754778
OTU	d__Bacteria;p__Fusobacteria;c__Fusobacteriia;o__Fusobacteriales;f__Fusobacteriaceae;g__Fusobacterium;OTU214	Lipid;Fatty Acid, Monohydroxy	13-HODE + 9-HODE	4.17884e-07	0.00762458	0.105994	0.494575	Kendall	0.516207	0.953738
OTU	d__Bacteria;p__Firmicutes;c__Clostridia;o__Clostridiales;f__Lachnospiraceae;g__Clostridium XlVa;OTU595	Lipid;Secondary Bile Acid Metabolism	glycoursodeoxycholate	4.28232e-07	0.00762458	0.556996	0.49394	Kendall	0.000339866	0.335506
OTU	d__Bacteria;p__Firmicutes;c__Clostridia;o__Clostridiales;f__Lachnospiraceae;g__Clostridium XlVa;OTU338	Lipid;Fatty Acid, Monohydroxy	13-HODE + 9-HODE	1.71946e-06	0.0284279	0.356593	0.456548	Kendall	0.0169927	0.63285
OTU	d__Bacteria;p__Firmicutes;c__Bacilli;o__Lactobacillales;f__Lactobacillaceae;g__Lactobacillus;OTU434	Amino Acid;Leucine, Isoleucine and Valine Metabolism	2-hydroxy-3-methylvalerate	3.01706e-06	0.0465556	0.139682	0.440695	Kendall	0.418684	0.933785

## Sheet: B 16S microbiome vs. metadata
Taxonomic Level	Microbial Name	Metadata	linear model p-value	adjusted linear model p-value	Spearman correlation	R2	nonparametric test	nonparametric p-value for urban vs. rural	adjusted nonparametric p-value for urban vs. rural
Genus	d__Bacteria;p__Proteobacteria;c__Betaproteobacteria;o__Burkholderiales;f__Sutterellaceae;g__Parasutterella	Used antibiotics in the past 6 months	9.43985e-07	0.00462081	NA	0.162364	Wilcox	0.0142504	0.671577
OTU	d__Bacteria;p__Bacteroidetes;c__Bacteroidia;o__Bacteroidales;f__Bacteroidaceae;g__Bacteroides;OTU209	Used antibiotics in the past 6 months	3.80794e-09	0.0001487	NA	0.11757	Wilcox	0.0120528	0.772565
OTU	d__Bacteria;p__Firmicutes;c__Clostridia;o__Clostridiales;f__Lachnospiraceae;g__Roseburia;OTU475	Used antibiotics in the past 6 months	1.03217e-07	0.00173254	NA	0.0889959	Wilcox	0.0386802	0.786425
OTU	d__Bacteria;p__Proteobacteria;c__Betaproteobacteria;o__Burkholderiales;f__Sutterellaceae;g__Parasutterella;OTU256	Used antibiotics in the past 6 months	1.4908e-07	0.00173254	NA	0.0860346	Wilcox	0.0540538	0.805436
OTU	d__Bacteria;p__Proteobacteria;c__Betaproteobacteria;o__Burkholderiales;f__Sutterellaceae;g__Parasutterella;OTU13	Used antibiotics in the past 6 months	1.77469e-07	0.00173254	NA	0.144969	Wilcox	0.0216346	0.780643
OTU	d__Bacteria;p__Firmicutes;c__Clostridia;o__Clostridiales;f__Lachnospiraceae;g__Clostridium XlVb;OTU156	Used antibiotics in the past 6 months	3.58758e-07	0.0028019	NA	0.0791378	Wilcox	0.0540538	0.805436
OTU	d__Bacteria;p__Firmicutes;c__Clostridia;o__Clostridiales;f__Lachnospiraceae;g__Lachnospiracea_incertae_sedis;OTU718	Used antibiotics in the past 6 months	6.93872e-07	0.00398037	NA	0.0741195	Wilcox	0.0540538	0.805436
OTU	d__Bacteria;p__Bacteroidetes;c__Bacteroidia;o__Bacteroidales;f__Bacteroidaceae;g__Bacteroides;OTU400	Insulin (µU/mL)	7.13511e-07	0.00398037	0.648613	0.489723	Kendall	3.5882e-05	0.472029
OTU	d__Bacteria;p__Firmicutes;c__Clostridia;o__Clostridiales;f__Lachnospiraceae;g__Lachnospiracea_incertae_sedis;OTU157	Used antibiotics in the past 6 months	1.22649e-06	0.00541748	NA	0.0970487	Wilcox	0.0326223	0.780643
OTU	d__Bacteria;p__Proteobacteria;c__Betaproteobacteria;o__Burkholderiales;f__Sutterellaceae;g__Parasutterella;OTU365	Used antibiotics in the past 6 months	1.31187e-06	0.00541748	NA	0.0694044	Wilcox	0.0983149	0.825634
OTU	d__Bacteria;p__Proteobacteria;c__Betaproteobacteria;o__Burkholderiales;f__Sutterellaceae;g__Parasutterella;OTU498	Used antibiotics in the past 6 months	1.38732e-06	0.00541748	NA	0.0689965	Wilcox	0.0737208	0.811786
OTU	d__Bacteria;p__Firmicutes;c__Clostridia;o__Clostridiales;f__Lachnospiraceae;g__Roseburia;OTU767	Taking probiotic supplements	2.27829e-06	0.00808792	NA	0.11237	Wilcox	0.0270445	0.780643
OTU	d__Bacteria;p__Firmicutes;c__Clostridia;o__Clostridiales;f__Lachnospiraceae;g__Clostridium XlVa;OTU772	Used antibiotics in the past 6 months	3.8933e-06	0.0126695	NA	0.0616436	Wilcox	0.0983149	0.825634
OTU	d__Bacteria;p__Firmicutes;c__Clostridia;o__Clostridiales;f__Lachnospiraceae;g__Ruminococcus2;OTU411	Taking probiotic supplements	8.96006e-06	0.0269146	NA	0.131676	Wilcox	0.0196568	0.779319
OTU	d__Bacteria;p__Proteobacteria;c__Betaproteobacteria;o__Burkholderiales;f__Sutterellaceae;g__Parasutterella;OTU575	Used antibiotics in the past 6 months	1.03138e-05	0.0282324	NA	0.0550011	Wilcox	0.12847	0.840585
OTU	d__Bacteria;p__Bacteroidetes;c__Bacteroidia;o__Bacteroidales;f__Bacteroidaceae;g__Bacteroides;OTU850	Used antibiotics in the past 6 months	1.09713e-05	0.0282324	NA	0.0550244	Wilcox	0.0174643	0.779319
OTU	d__Bacteria;p__Bacteroidetes;c__Bacteroidia;o__Bacteroidales;f__Bacteroidaceae;g__Bacteroides;OTU383	Used antibiotics in the past 6 months	1.15677e-05	0.0282324	NA	0.0542377	Wilcox	0.112657	0.830237
OTU	d__Bacteria;p__Firmicutes;c__Clostridia;o__Clostridiales;f__Lachnospiraceae;g__Roseburia;OTU404	Gender	1.37507e-05	0.0315862	NA	0.377003	Wilcox	7.62867e-05	0.472029
OTU	d__Bacteria;p__Bacteroidetes;c__Bacteroidia;o__Bacteroidales;f__Bacteroidaceae;g__Bacteroides;OTU774	Used antibiotics in the past 6 months	1.49812e-05	0.0325009	NA	0.0525317	Wilcox	0.12847	0.840585
OTU	d__Bacteria;p__Bacteroidetes;c__Bacteroidia;o__Bacteroidales;f__Bacteroidaceae;g__Bacteroides;OTU209	Insulin (µU/mL)	1.80304e-05	0.0370573	0.602114	0.395535	Kendall	7.236e-05	0.472029
OTU	d__Bacteria;p__Actinobacteria;c__Actinobacteria;o__Coriobacteriales;f__Coriobacteriaceae;g__Adlercreutzia;OTU703	Used antibiotics in the past 6 months	2.02035e-05	0.0376508	NA	0.0505836	Wilcox	0.12847	0.840585
OTU	d__Bacteria;p__Firmicutes;c__Clostridia;o__Clostridiales;f__Lachnospiraceae;g__Lachnospiracea_incertae_sedis;OTU769	Taking probiotic supplements	2.02476e-05	0.0376508	NA	0.0875083	Wilcox	0.0418852	0.787166
OTU	d__Bacteria;p__Firmicutes;c__Clostridia;o__Clostridiales;f__Lachnospiraceae;g__Clostridium XlVa;OTU835	3-Day Ave: Fat (g)	2.19705e-05	0.0389977	0.411448	0.389277	Kendall	0.00860333	0.772565
OTU	d__Bacteria;p__Bacteroidetes;c__Bacteroidia;o__Bacteroidales;f__Bacteroidaceae;g__Bacteroides;OTU764	Used antibiotics in the past 6 months	2.33406e-05	0.0391596	NA	0.0496528	Wilcox	0.145836	0.846406
OTU	d__Bacteria;p__Firmicutes;c__Clostridia;o__Clostridiales;f__Lachnospiraceae;g__Clostridium XlVb;OTU470	Used antibiotics in the past 6 months	2.40673e-05	0.0391596	NA	0.0494559	Wilcox	0.12847	0.840585

## Sheet: C metadata vs. metabolite
Metabolite Superpathway;Subpathway	Metabolite Name	Metadata	linear model p-value	adjusted linear model p-value	Spearman correlation	R2	nonparametric test	nonparametric p-value for urban vs. rural	adjusted nonparametric p-value for urban vs. rural
Carbohydrate;Glycolysis, Gluconeogenesis, and Pyruvate Metabolism	glucose	Glucose (mmol/L)	1.07711e-22	1.97866e-18	0.663664	0.927629	Kendall	5.126e-06	0.0188329
Xenobiotics;Food Component/Plant	thymol sulfate	3-Day Ave: Manganese (mg)	2.11876e-19	1.94608e-15	0.273861	0.891067	Kendall	0.100224	0.674193
Lipid;Steroid	5alpha-androstan-3beta,17beta-diol disulfate	3-Day Ave: Alcohol by volume (ml)	1.30648e-15	8.00001e-12	0.462245	0.825745	Kendall	0.00378168	0.279613
Carbohydrate;Fructose, Mannose and Galactose Metabolism	mannose	Glucose (mmol/L)	2.21508e-14	1.01728e-10	0.5432	0.797117	Kendall	0.000392318	0.136557
Lipid;Steroid	4-androsten-3beta,17beta-diol disulfate (1)	3-Day Ave: Alcohol by weight (g)	2.75947e-13	9.65257e-10	0.486193	0.767702	Kendall	0.00213921	0.211581
Lipid;Monoacylglycerol	1-linoleoylglycerol (18:2)	Triglycerides (mmol/L)	3.15272e-13	9.65257e-10	0.741333	0.766036	Kendall	2.38419e-07	0.00145992
Carbohydrate;Fructose, Mannose and Galactose Metabolism	fructose	Glucose (mmol/L)	4.10071e-13	1.07614e-09	0.357714	0.762714	Kendall	0.0189009	0.455899
Lipid;Steroid	4-androsten-3beta,17beta-diol disulfate (1)	3-Day Ave: Alcohol by volume (ml)	1.20056e-12	2.47829e-09	0.437379	0.748646	Kendall	0.00726342	0.343889
Lipid;Steroid	5alpha-androstan-3beta,17beta-diol disulfate	3-Day Ave: Alcohol by weight (g)	1.21419e-12	2.47829e-09	0.406726	0.748494	Kendall	0.00986922	0.376899
Carbohydrate;Glycolysis, Gluconeogenesis, and Pyruvate Metabolism	glucose	HbA1c (%)	2.7501e-12	5.05194e-09	0.238323	0.737231	Kendall	0.18088	0.75771
Lipid;Secondary Bile Acid Metabolism	tauroursodeoxycholate	3-Day Ave: Alcohol by volume (ml)	1.04463e-11	1.74454e-08	0.318201	0.717764	Kendall	0.0500422	0.580717
Lipid;Secondary Bile Acid Metabolism	taurodeoxycholate	3-Day Ave: Manganese (mg)	1.48076e-11	2.26679e-08	0.0100253	0.712445	Kendall	0.922856	0.99529
Amino Acid;Methionine, Cysteine, SAM and Taurine Metabolism	cystine	3-Day Ave: Alcohol by volume (ml)	2.04297e-09	2.70756e-06	0.32717	0.625911	Kendall	0.0461287	0.573528
Amino Acid;Lysine Metabolism	pipecolate	3-Day Ave: Alcohol by volume (ml)	2.06347e-09	2.70756e-06	0.315824	0.625712	Kendall	0.0580983	0.61005
Lipid;Secondary Bile Acid Metabolism	tauroursodeoxycholate	3-Day Ave: Alcohol by weight (g)	2.79812e-09	3.42676e-06	0.282332	0.619592	Kendall	0.0891205	0.664679
Peptide;Fibrinogen Cleavage Peptide	ADSGEGDFXAEGGGVR	Glucose (mmol/L)	4.41732e-09	5.07164e-06	0.574885	0.610235	Kendall	0.000270605	0.130816
Lipid;Sterol	cholesterol	cholesterol (mmol/L)	7.65439e-09	8.27124e-06	0.769978	0.59867	Kendall	2.38419e-07	0.00145992
Carbohydrate;Fructose, Mannose and Galactose Metabolism	fructose	HbA1c (%)	1.51893e-08	1.55015e-05	0.00345708	0.583785	Kendall	0.990294	1
Carbohydrate;Fructose, Mannose and Galactose Metabolism	mannose	HbA1c (%)	1.8964e-08	1.76707e-05	0.394087	0.57885	Kendall	0.0130839	0.420422
Lipid;Sterol	cholesterol	LDL (mmol/L)	1.96111e-08	1.76707e-05	0.776861	0.578099	Kendall	1.19209e-07	0.00145992
Carbohydrate;Fructose, Mannose and Galactose Metabolism	mannose	3-Day Ave: Manganese (mg)	2.02006e-08	1.76707e-05	0.197773	0.577435	Kendall	0.199749	0.772176
Peptide;Fibrinogen Cleavage Peptide	ADSGEGDFXAEGGGVR	3-Day Ave: Manganese (mg)	4.00631e-08	3.34527e-05	0.34919	0.5618	Kendall	0.0244478	0.489222
Amino Acid;Methionine, Cysteine, SAM and Taurine Metabolism	cystine	3-Day Ave: Alcohol by weight (g)	4.92675e-08	3.93498e-05	0.449467	0.556969	Kendall	0.00624025	0.327982
Amino Acid;Methionine, Cysteine, SAM and Taurine Metabolism	cysteine	3-Day Ave: Alcohol by volume (ml)	6.06081e-08	4.63905e-05	0.388319	0.552077	Kendall	0.0154637	0.436703
Xenobiotics;Chemical	2-methoxyresorcinol sulfate	3-Day Ave: Manganese (mg)	7.5193e-08	5.52518e-05	0.17253	0.546931	Kendall	0.282351	0.822755
Xenobiotics;Food Component/Plant	thymol sulfate	3-Day Ave: Iron (mg)	9.62086e-08	6.79751e-05	0.273861	0.540979	Kendall	0.100224	0.674193
Amino Acid;Methionine, Cysteine, SAM and Taurine Metabolism	cysteine	3-Day Ave: Alcohol by weight (g)	1.07262e-07	7.29778e-05	0.460779	0.538328	Kendall	0.00544393	0.315503
Xenobiotics;Food Component/Plant	gluconate	HbA1c (%)	2.77614e-07	0.000182135	0.371617	0.514518	Kendall	0.0236651	0.486037
Lipid;Steroid	etiocholanolone glucuronide	Taking probiotic supplements	3.02877e-07	0.000191857	NA	0.138143	Wilcox	0.00195778	0.209243
Amino Acid;Lysine Metabolism	pipecolate	3-Day Ave: Alcohol by weight (g)	3.25401e-07	0.000199254	0.126011	0.510428	Kendall	0.478631	0.898803
Lipid;Fatty Acid, Dicarboxylate	octadecanedioate	3-Day Ave: Alcohol by volume (ml)	3.75242e-07	0.000222361	0.299617	0.50673	Kendall	0.0654286	0.621656
Lipid;Primary Bile Acid Metabolism	taurocholate	3-Day Ave: Manganese (mg)	5.04858e-07	0.00028982	-0.121142	0.498946	Kendall	0.576738	0.926677
Peptide;Gamma-glutamyl Amino Acid	gamma-glutamyltryptophan	Used antibiotics in the past 6 months	6.29311e-07	0.000350316	NA	0.0748538	Wilcox	0.0737208	0.636529
Lipid;Fatty Acid, Dicarboxylate	octadecanedioate	3-Day Ave: Alcohol by weight (g)	7.33475e-07	0.000396292	0.211178	0.48898	Kendall	0.184781	0.761253
Xenobiotics;Food Component/Plant	daidzein sulfate (2)	3-Day Ave: Vitamin A (mcg)	9.98973e-07	0.000524318	-0.00458301	0.480595	Kendall	0.918652	0.99529
Xenobiotics;Food Component/Plant	gluconate	Glucose (mmol/L)	1.07265e-06	0.000547348	0.213899	0.478645	Kendall	0.250368	0.811029
Lipid;Primary Bile Acid Metabolism	taurochenodeoxycholate	3-Day Ave: Manganese (mg)	1.16508e-06	0.000578447	0.0585168	0.476371	Kendall	0.611284	0.936037
Carbohydrate;Pentose Metabolism	arabinose	Used antibiotics in the past 6 months	1.27483e-06	0.00061628	NA	0.0700526	Wilcox	0.0446438	0.569519
Amino Acid;Methionine, Cysteine, SAM and Taurine Metabolism	2-hydroxybutyrate (AHB)	HbA1c (%)	1.58663e-06	0.000747343	0.387885	0.467793	Kendall	0.0149817	0.434813
Lipid;Fatty Acid, Dicarboxylate	hexadecanedioate	3-Day Ave: Alcohol by volume (ml)	1.76832e-06	0.000812102	0.194269	0.46475	Kendall	0.246852	0.808897
Amino Acid;Lysine Metabolism	lysine	Used antibiotics in the past 6 months	2.52442e-06	0.00111743	NA	0.0879685	Wilcox	0.0181639	0.451758
Xenobiotics;Tobacco Metabolite	cotinine N-oxide	3-Day Ave: Calcium (mg)	2.55483e-06	0.00111743	0.321305	0.4543	Kendall	0.043746	0.569519
Xenobiotics;Food Component/Plant	2-piperidinone	3-Day Ave: Thiamin (mg)	4.14364e-06	0.0017702	0.493725	0.440274	Kendall	0.00129187	0.191217
Lipid;Steroid	4-androsten-3beta,17beta-diol disulfate (1)	3-Day Ave: Water (g)	4.657e-06	0.0019443	0.563158	0.436837	Kendall	0.000176787	0.108253
Nucleotide;Purine Metabolism, Guanine containing	guanosine	Taking probiotic supplements	5.10677e-06	0.0020847	NA	0.127635	Wilcox	0.00657986	0.337015
Carbohydrate;Aminosugar Metabolism	glucuronate	3-Day Ave: Manganese (mg)	5.50618e-06	0.00219888	0.272267	0.431872	Kendall	0.0815172	0.650521
Nucleotide;Purine Metabolism, (Hypo)Xanthine/Inosine containing	inosine	Taking probiotic supplements	6.42138e-06	0.0025098	NA	0.101203	Wilcox	0.00218148	0.213478
Lipid;Secondary Bile Acid Metabolism	taurodeoxycholate	3-Day Ave: Iron (mg)	6.79544e-06	0.00260067	0.00182279	0.425579	Kendall	0.865432	0.988716
Xenobiotics;Chemical	1,2,3-benzenetriol sulfate (2)	3-Day Ave: Manganese (mg)	7.38409e-06	0.00276828	0.00870483	0.423076	Kendall	0.950549	1
Amino Acid;Glutamate Metabolism	pyroglutamine	Gender	9.52923e-06	0.00350104	NA	0.393636	Wilcox	8.9764e-06	0.0235566
Lipid;Sphingolipid Metabolism	palmitoyl sphingomyelin (d18:1/16:0)	cholesterol (mmol/L)	9.75346e-06	0.00351316	0.607926	0.414617	Kendall	0.000102997	0.0822631
Xenobiotics;Tobacco Metabolite	cotinine	3-Day Ave: Carbohydrate (g)	1.04427e-05	0.00368908	0.362767	0.412525	Kendall	0.0247446	0.494623
Amino Acid;Glycine, Serine and Threonine Metabolism	sarcosine (N-Methylglycine)	Used antibiotics in the past 6 months	1.06789e-05	0.00370135	NA	0.127783	Wilcox	0.0141572	0.429504
Amino Acid;Creatine Metabolism	creatinine	Gender	1.1482e-05	0.00390599	NA	0.383378	Wilcox	3.97633e-05	0.0486968
Lipid;Fatty Acid, Monohydroxy	2-hydroxydecanoate	3-Day Ave: Ash (g)	1.22083e-05	0.00407756	0.172267	0.407711	Kendall	0.321225	0.836651
Lipid;Fatty Acid, Monohydroxy	2-hydroxydecanoate	3-Day Ave: Sodium (mg)	1.41341e-05	0.00463648	0.240283	0.403164	Kendall	0.146606	0.721444
Xenobiotics;Food Component/Plant	daidzein sulfate (2)	3-Day Ave: Retinol (mcg)	1.53768e-05	0.00495564	0.063949	0.400534	Kendall	0.720748	0.96145
Amino Acid;Methionine, Cysteine, SAM and Taurine Metabolism	2-hydroxybutyrate (AHB)	Glucose (mmol/L)	1.63557e-05	0.00518025	0.475983	0.3986	Kendall	0.00238955	0.222294
Lipid;Steroid	5alpha-androstan-3beta,17beta-diol disulfate	3-Day Ave: Water (g)	1.7378e-05	0.00532641	0.567148	0.396696	Kendall	0.000234365	0.1202
Xenobiotics;Food Component/Plant	thymol sulfate	Glucose (mmol/L)	1.79447e-05	0.00532641	0.273903	0.395685	Kendall	0.100173	0.674193
Lipid;Fatty Acid, Dicarboxylate	hexadecanedioate	3-Day Ave: Alcohol by weight (g)	1.79547e-05	0.00532641	0.144769	0.395668	Kendall	0.354182	0.853751
Carbohydrate;Aminosugar Metabolism	glucuronate	Glucose (mmol/L)	1.7977e-05	0.00532641	0.530546	0.395629	Kendall	0.000515461	0.155043
Peptide;Gamma-glutamyl Amino Acid	gamma-glutamylvaline	Waist circumference (cm)	2.13325e-05	0.00622029	0.649549	0.390214	Kendall	3.11136e-05	0.0473951
Lipid;Steroid	pregnen-diol disulfate	Used antibiotics in the past 6 months	2.40648e-05	0.00690735	NA	0.0690433	Wilcox	0.0518656	0.590709
Amino Acid;Leucine, Isoleucine and Valine Metabolism	valine	Triglycerides (mmol/L)	2.62257e-05	0.00731098	0.656511	0.383621	Kendall	9.32217e-05	0.0778401
Amino Acid;Leucine, Isoleucine and Valine Metabolism	beta-hydroxyisovalerate	Glucose (mmol/L)	2.6267e-05	0.00731098	0.369692	0.383571	Kendall	0.01068	0.390516
Amino Acid;Phenylalanine and Tyrosine Metabolism	phenol sulfate	Taking probiotic supplements	2.68747e-05	0.00736849	NA	0.0933907	Wilcox	0.00467558	0.302431
Peptide;Dipeptide	glycylvaline	cholesterol (mmol/L)	2.80835e-05	0.00758667	0.543577	0.381422	Kendall	0.000342011	0.136557
Xenobiotics;Benzoate Metabolism	3-methyl catechol sulfate (1)	3-Day Ave: Potassium (mg)	2.88199e-05	0.00766996	0.302291	0.380588	Kendall	0.076126	0.645175
Cofactors and Vitamins;Hemoglobin and Porphyrin Metabolism	biliverdin	3-Day Ave: Manganese (mg)	2.92268e-05	0.00766996	0.12531	0.380136	Kendall	0.460537	0.894052
Carbohydrate;Fructose, Mannose and Galactose Metabolism	fructose	3-Day Ave: Manganese (mg)	3.14859e-05	0.00803676	0.0255074	0.377731	Kendall	0.818203	0.979168
Nucleotide;Purine Metabolism, Guanine containing	guanosine	3-Day Ave: Vitamin A (mcg)	3.14996e-05	0.00803676	0.318938	0.377717	Kendall	0.0414451	0.559141
Cofactors and Vitamins;Ascorbate and Aldarate Metabolism	arabonate	Age (years)	3.54253e-05	0.00889437	0.639178	0.373905	Kendall	2.36034e-05	0.0473951
Lipid;Steroid	etiocholanolone glucuronide	3-Day Ave: Potassium (mg)	3.58293e-05	0.00889437	0.516776	0.373536	Kendall	0.00241101	0.222294
Lipid;Secondary Bile Acid Metabolism	taurodeoxycholate	Glucose (mmol/L)	3.90203e-05	0.00955737	0.162506	0.370753	Kendall	0.250068	0.811029
Lipid;Lysolipid	1-stearoyl-GPI (18:0)	cholesterol (mmol/L)	4.20229e-05	0.0101574	0.545574	0.368326	Kendall	0.000393152	0.136557
Lipid;Sphingolipid Metabolism	palmitoyl sphingomyelin (d18:1/16:0)	LDL (mmol/L)	5.01424e-05	0.0119625	0.612278	0.362507	Kendall	8.4281e-05	0.0737258
Xenobiotics;Tobacco Metabolite	cotinine	3-Day Ave: Calcium (mg)	5.41195e-05	0.0127458	0.156185	0.359978	Kendall	0.347746	0.853751
Lipid;Steroid	epiandrosterone sulfate	Gender	5.6456e-05	0.0131278	NA	0.33388	Wilcox	0.000170516	0.108253
Carbohydrate;Glycolysis, Gluconeogenesis, and Pyruvate Metabolism	1,5-anhydroglucitol (1,5-AG)	HbA1c (%)	5.89443e-05	0.0135351	-0.397544	0.357138	Kendall	0.0171179	0.44969
Xenobiotics;Food Component/Plant	erythritol	Age (years)	6.001e-05	0.0136097	0.638975	0.356541	Kendall	3.25441e-05	0.0473951
Amino Acid;Leucine, Isoleucine and Valine Metabolism	valine	Weight (kg)	6.11505e-05	0.0136992	0.530594	0.355913	Kendall	0.00172842	0.199938
Lipid;Fatty Acid, Dicarboxylate	tetradecanedioate	3-Day Ave: Alcohol by volume (ml)	6.80353e-05	0.0149958	0.19547	0.352343	Kendall	0.243926	0.805681
Amino Acid;Glutamate Metabolism	glutamate	BMI (kg/m2)	6.85707e-05	0.0149958	0.601215	0.35208	Kendall	0.000132084	0.0933224
Peptide;Fibrinogen Cleavage Peptide	ADSGEGDFXAEGGGVR	3-Day Ave: Iron (mg)	7.09127e-05	0.0153255	0.144939	0.350952	Kendall	0.345397	0.851531
Peptide;Fibrinogen Cleavage Peptide	ADSGEGDFXAEGGGVR	HbA1c (%)	7.36359e-05	0.015714	0.32261	0.349685	Kendall	0.0610307	0.61635
Carbohydrate;Fructose, Mannose and Galactose Metabolism	mannose	Insulin (µU/mL)	7.44213e-05	0.015714	0.495142	0.349328	Kendall	0.00100064	0.175065
Lipid;Fatty Acid, Dicarboxylate	tetradecanedioate	3-Day Ave: Alcohol by weight (g)	7.6099e-05	0.0158857	0.234097	0.348576	Kendall	0.148679	0.727667
Amino Acid;Glutamate Metabolism	glutamate	3-Day Ave: Alpha tocopherol (mg)	9.65777e-05	0.0199341	0.716599	0.340497	Kendall	1.19209e-06	0.00547469
Peptide;Gamma-glutamyl Amino Acid	gamma-glutamylleucine	Waist circumference (cm)	9.954e-05	0.0203086	0.584017	0.339467	Kendall	0.000117898	0.0902411
Amino Acid;Leucine, Isoleucine and Valine Metabolism	beta-hydroxyisovalerate	HbA1c (%)	0.000100603	0.0203086	0.345995	0.339104	Kendall	0.0303715	0.520939
Lipid;Primary Bile Acid Metabolism	taurocholate	3-Day Ave: Iron (mg)	0.000104391	0.0207987	0.12052	0.337841	Kendall	0.280542	0.822755
Lipid;Long Chain Fatty Acid	margarate (17:0)	3-Day Ave: Potassium (mg)	0.000105295	0.0207987	0.133603	0.337546	Kendall	0.513607	0.907645
Amino Acid;Tryptophan Metabolism	indolelactate	3-Day Ave: Niacin (mg)	0.000107305	0.0209122	0.526721	0.336898	Kendall	0.00140524	0.191217
Amino Acid;Glycine, Serine and Threonine Metabolism	N-acetylglycine	3-Day Ave: Alcohol by volume (ml)	0.000108514	0.0209122	0.0738091	0.336515	Kendall	0.673681	0.950334
Carbohydrate;Pentose Metabolism	xylonate	3-Day Ave: Thiamin (mg)	0.000109286	0.0209122	0.58502	0.336272	Kendall	0.000194669	0.113367
Lipid;Steroid	etiocholanolone glucuronide	3-Day Ave: Magnesium (mg)	0.00012061	0.0228413	0.480436	0.332885	Kendall	0.00450993	0.296944
Amino Acid;Lysine Metabolism	glutarylcarnitine (C5)	Gender	0.000136582	0.0256022	NA	0.301356	Wilcox	6.2767e-06	0.0192171
Amino Acid;Lysine Metabolism	glutarylcarnitine (C5)	Creatinine in urine (mg/dL)	0.00013851	0.0257013	0.678779	0.328105	Kendall	2.99215e-05	0.0473951
Lipid;Lysolipid	1-palmitoyl-GPE (16:0)	cholesterol (mmol/L)	0.000147913	0.0271715	0.510248	0.325827	Kendall	0.00134635	0.191217
Lipid;Lysolipid	1-stearoyl-GPI (18:0)	LDL (mmol/L)	0.000165957	0.0301844	0.500531	0.321817	Kendall	0.000878215	0.171903
Amino Acid;Glycine, Serine and Threonine Metabolism	N-acetylglycine	3-Day Ave: Alcohol by weight (g)	0.000174186	0.0313705	0.0450795	0.320125	Kendall	0.785236	0.973432
Carbohydrate;Fructose, Mannose and Galactose Metabolism	mannitol	3-Day Ave: Sodium (mg)	0.000178724	0.0316636	0.0299595	0.319224	Kendall	0.808829	0.977705
Cofactors and Vitamins;Hemoglobin and Porphyrin Metabolism	bilirubin (Z,Z)	Used antibiotics in the past 6 months	0.000179525	0.0316636	NA	0.0447918	Wilcox	0.155378	0.734243
Carbohydrate;Pentose Metabolism	xylitol	3-Day Ave: Ash (g)	0.000180984	0.0316636	0.275495	0.318784	Kendall	0.0922507	0.668952
Xenobiotics;Food Component/Plant	2-piperidinone	3-Day Ave: Potassium (mg)	0.000187328	0.0324643	0.194534	0.317575	Kendall	0.309564	0.832727
Nucleotide;Pyrimidine Metabolism, Uracil containing	N-acetyl-beta-alanine	3-Day Ave: Thiamin (mg)	0.000190637	0.0327289	0.488664	0.31696	Kendall	0.00341761	0.260504
Lipid;Fatty Acid, Monohydroxy	2-hydroxystearate	cholesterol (mmol/L)	0.000197138	0.0334306	0.527658	0.31578	Kendall	0.000675201	0.155043
Cofactors and Vitamins;Nicotinate and Nicotinamide Metabolism	N1-Methyl-2-pyridone-5-carboxamide	Insulin (µU/mL)	0.000198363	0.0334306	0.512551	0.315562	Kendall	0.00180244	0.199938
Carbohydrate;Fructose, Mannose and Galactose Metabolism	mannose	Waist circumference (cm)	0.000206325	0.0344563	0.55272	0.314176	Kendall	0.000584126	0.155043
Peptide;Gamma-glutamyl Amino Acid	gamma-glutamylphenylalanine	BMI (kg/m2)	0.000211156	0.0349454	0.544562	0.313359	Kendall	0.000675201	0.155043
Xenobiotics;Food Component/Plant	2-piperidinone	3-Day Ave: Zinc (mg)	0.000214231	0.0351377	0.345344	0.312849	Kendall	0.0446347	0.569519
Lipid;Steroid	etiocholanolone glucuronide	3-Day Ave: Thiamin (mg)	0.000222381	0.0359412	0.470387	0.311529	Kendall	0.00241101	0.222294
Lipid;Lysolipid	1-stearoyl-GPE (18:0)	cholesterol (mmol/L)	0.000223043	0.0359412	0.495293	0.311423	Kendall	0.00128984	0.191217
Lipid;Primary Bile Acid Metabolism	taurochenodeoxycholate	3-Day Ave: Iron (mg)	0.000228141	0.036443	0.0749177	0.310623	Kendall	0.49799	0.902977
Lipid;Phospholipid Metabolism	choline	cholesterol (mmol/L)	0.000236646	0.0374757	0.548003	0.309326	Kendall	0.000393152	0.136557
Amino Acid;Phenylalanine and Tyrosine Metabolism	3-(4-hydroxyphenyl)lactate	Waist circumference (cm)	0.000241473	0.0379133	0.502431	0.308609	Kendall	0.00138795	0.191217
Carbohydrate;Aminosugar Metabolism	glucuronate	HbA1c (%)	0.000249289	0.0386468	0.371719	0.307477	Kendall	0.0252084	0.497005
Lipid;Steroid	4-androsten-3beta,17beta-diol disulfate (1)	3-Day Ave: Food intake (g)	0.000250352	0.0386468	0.522065	0.307326	Kendall	0.000646472	0.155043
Cofactors and Vitamins;Tocopherol Metabolism	alpha-tocopherol	Triglycerides (mmol/L)	0.000257783	0.0388906	0.455489	0.306285	Kendall	0.00414157	0.287097
Carbohydrate;Glycolysis, Gluconeogenesis, and Pyruvate Metabolism	1,5-anhydroglucitol (1,5-AG)	Glucose (mmol/L)	0.000259045	0.0388906	-0.15559	0.306111	Kendall	0.377093	0.86522
Lipid;Fatty Acid, Dicarboxylate	tetradecanedioate	3-Day Ave: Water (g)	0.00025953	0.0388906	0.503905	0.306044	Kendall	0.00124788	0.19103
Carbohydrate;Fructose, Mannose and Galactose Metabolism	mannose	3-Day Ave: Iron (mg)	0.000261672	0.0388906	0.136032	0.305752	Kendall	0.276278	0.817267
Lipid;Fatty Acid, Dicarboxylate	octadecanedioate	3-Day Ave: Water (g)	0.000262517	0.0388906	0.349595	0.305637	Kendall	0.0421258	0.559141
Amino Acid;Phenylalanine and Tyrosine Metabolism	tyrosine	Triglycerides (mmol/L)	0.000270765	0.0397917	0.516322	0.304533	Kendall	0.000617862	0.155043
Amino Acid;Leucine, Isoleucine and Valine Metabolism	leucine	Triglycerides (mmol/L)	0.000281339	0.0410174	0.532314	0.303165	Kendall	0.000565052	0.155043
Nucleotide;Purine Metabolism, Guanine containing	guanosine	3-Day Ave: Retinol (mcg)	0.000312076	0.0451404	0.230626	0.299451	Kendall	0.166469	0.746546
Lipid;Sphingolipid Metabolism	stearoyl sphingomyelin (d18:1/18:0)	cholesterol (mmol/L)	0.000317001	0.0453149	0.633838	0.298888	Kendall	8.4281e-05	0.0737258
Amino Acid;Leucine, Isoleucine and Valine Metabolism	valine	BMI (kg/m2)	0.000318216	0.0453149	0.479757	0.298751	Kendall	0.00316095	0.250288
Lipid;Lysolipid	2-palmitoleoyl-GPC (16:1)	3-Day Ave: Alcohol by weight (g)	0.000323193	0.0456696	0.396694	0.298193	Kendall	0.0160762	0.440028
Lipid;Steroid	etiocholanolone glucuronide	3-Day Ave: Protein (g)	0.000326012	0.0457164	0.429784	0.29788	Kendall	0.00939429	0.372546
Lipid;Lysolipid	2-palmitoleoyl-GPC (16:1)	Creatinine in urine (mg/dL)	0.000328534	0.045721	0.5495	0.297603	Kendall	0.000528812	0.155043
Lipid;Lysolipid	1-oleoyl-GPC (18:1)	Insulin (µU/mL)	0.000345665	0.0477433	-0.65587	0.295772	Kendall	3.51676e-05	0.0473951
